# Supplementary material for: Knockdown of Matrix Metallopeptidase 9 Inhibits Metastasis of Oral Squamous Cell Carcinoma Cells in a Zebrafish Xenograft Model
Source: Hindawi journal article supplement (doi:10.1155/2020/4350783), 2020-01-01
Supplement: f1 [file 4350783.f1.pdf]

## Supplemental Materials

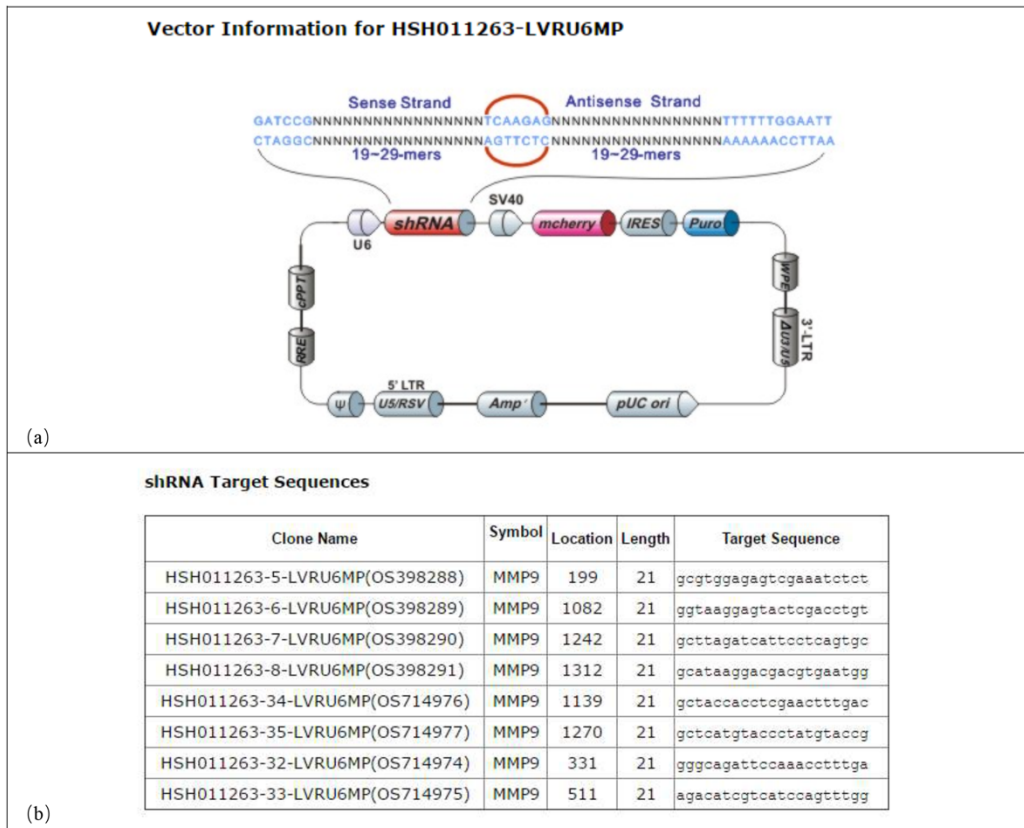

Supplemental Figure 1: *The shRNA expression clone datasheet.* (a) The vector information. (b) The shRNA target sequences. The sequence 33 was selected for subsequent lentivirus packaging and transfection.

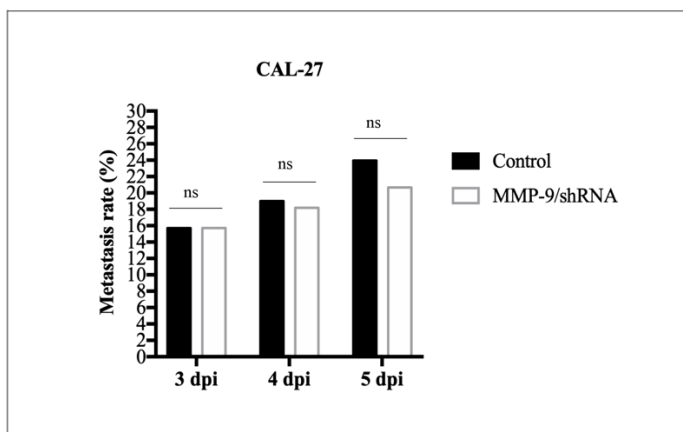

Supplemental Figure 2: *Knockdown of MMP-9 in CAL-27 cells could slight inhibit the metastasis rate from 3 dpi to 5 dpi, but the results were not statistically significant.* ns, no significance.
